# Supplementary material for: scConfluence: single-cell diagonal integration with regularized Inverse Optimal Transport on weakly connected features
Source: PubMed Central journal article supplement — Nat Commun. 2024 Sep 5;15:7762. doi: 10.1038/s41467-024-51382-x (PMC11377776; doi:10.1038/s41467-024-51382-x), 2024-09-05
Supplement: 41467_2024_51382_MOESM1_ESM.pdf [file 41467_2024_51382_MOESM1_ESM.pdf]

# **Supplementary Information for “*scConfluence : single-cell diagonal integration with regularized Inverse Optimal Transport on weakly connected features*”**

The Supplementary Information is organized as follows:

- Page 2 of this PDF: Supplementary Note 1
- Pages 3 to 5: Supplementary Tables 1 to 6
- Pages 6 to 13: Supplementary Figures 1 to 18

### Supplementary Note 1

The proof only uses two classical results in OT theory. Firstly, there is a primal-dual relationship linking the optimal plan  $\mathbf{Q}_\varepsilon(\mathbf{a}, \mathbf{b})$  to an optimal pair of potentials  $(\mathbf{f}, \mathbf{g})$  such that:

$$\mathbf{Q}(\mathbf{a}, \mathbf{b}) = \exp\left(\frac{1}{\varepsilon}(\mathbf{f} \oplus \mathbf{g} - \mathbf{c}_{L_2}(\mathbf{a}, \mathbf{b}))\right)$$

Secondly, the optimal value of the entropic OT problem can be expressed with this optimal pair of potentials:

$$\left(\frac{1}{n_1}\mathbf{1}\right)^T \mathbf{f} + \left(\frac{1}{n_2}\mathbf{1}\right)^T \mathbf{g} - \varepsilon = OT_\varepsilon^{+\infty}(\mathbf{a}, \mathbf{b}, c_{L_2})$$

$$\begin{aligned} KL(\mathbf{P}|\mathbf{Q}_\varepsilon(\mathbf{a}, \mathbf{b})) &= \langle \mathbf{P}, \log\left(\frac{\mathbf{P}}{\mathbf{Q}_\varepsilon(\mathbf{a}, \mathbf{b})}\right) \rangle \\ &= \langle \mathbf{P}, \log(\mathbf{P}) \rangle - \langle \mathbf{P}, \log(\mathbf{Q}_\varepsilon(\mathbf{a}, \mathbf{b})) \rangle \\ &= \langle \mathbf{P}, \log(\mathbf{P}) \rangle - \left\langle \mathbf{P}, \frac{1}{\varepsilon}(\mathbf{f} \oplus \mathbf{g} - \mathbf{c}_{L_2}(\mathbf{a}, \mathbf{b})) \right\rangle \\ &= \langle \mathbf{P}, \log(\mathbf{P}) \rangle + \frac{1}{\varepsilon} \langle \mathbf{P}, \mathbf{c}_{L_2}(\mathbf{a}, \mathbf{b}) \rangle - \frac{1}{\varepsilon} \langle \mathbf{P}, \mathbf{f} \oplus \mathbf{g} \rangle \end{aligned}$$

$$\begin{aligned} \langle \mathbf{P}, \mathbf{f} \oplus \mathbf{g} \rangle &= (\mathbf{P}\mathbf{1})^T \mathbf{f} + (\mathbf{P}^T \mathbf{1})^T \mathbf{g} \\ &= \left(\frac{1}{n_1}\mathbf{1}\right)^T \mathbf{f} + \left(\frac{1}{n_2}\mathbf{1}\right)^T \mathbf{g} \\ &= OT_\varepsilon^{+\infty}(\mathbf{a}, \mathbf{b}, c_{L_2}) + \varepsilon \end{aligned}$$

**Supplementary Table 1.** List of the datasets used in this paper and their characteristics.

| Dataset Name    | Technology     | Modalities        | Organism | Tissue                | Cells (after QC) | Labels | Batches | Reference                                                |
|-----------------|----------------|-------------------|----------|-----------------------|------------------|--------|---------|----------------------------------------------------------|
| Cell lines      | scCAT-seq      | RNA, ATAC         | Human    | Cell lines            | 206              | 3      | 1       | Liu, L. et al <sup>1</sup>                               |
| PBMC 10X        | 10X Multiome   | RNA, ATAC         | Human    | PBMC                  | 9,378            | 14     | 1       | 10X genomics                                             |
| OP Multiome     | 10X Multiome   | RNA, ATAC         | Human    | Bone marrow           | 69,249           | 22     | 13      | Luecken, M et al. <sup>2</sup>                           |
| BMCITE          | Cite-seq       | RNA, ADT          | Human    | Bone marrow           | 30,672           | 27     | 1       | Stuart, T. et al. <sup>3</sup>                           |
| OP Cite         | Cite-seq       | RNA, ADT          | Human    | Bone marrow           | 90,261           | 31     | 12      | Luecken, M et al. <sup>2</sup>                           |
| Smartseq cortex | Smartseq2      | RNA               | Mouse    | Somato sensory cortex | 3005             | 6      | 1       | Zeisel, A. et al. <sup>4</sup>                           |
| smFISH          | osmFISH        | RNA               | Mouse    | Somato sensory cortex | 4530             | 6      | 1       | Codeluppi, C. et al. <sup>5</sup>                        |
| 3omics RNA      | Seq-Well       | RNA               | Human    | PBMC                  | 16627            | 12     | 6       | Wilk, A. J. et al. <sup>6</sup>                          |
| 3omics ATAC     | 10X scATAC-seq | ATAC              | Human    | PBMC                  | 21261            | 18     | 4       | Satpathy, A. T. et al. <sup>7</sup>                      |
| 3omics CyTOF    | Helios CyTOF   | Protein           | Human    | PBMC                  | 43232            | 21     | 1       | Covid-19 Multi-omics Blood Atlas Consortium <sup>8</sup> |
| Patch neurons   | Patch-seq      | RNA, morphologies | Mouse    | Primary motor cortex  | 1214             | 7      | 1       | Scala, F. et al <sup>9</sup>                             |

**Supplementary table 2.** List of genes identified as differentially expressed in both the scRNA and scATAC gene activities for each B cell cluster.

| Cluster 0                                                                                                                                                                                                                           | Cluster 1                                                                                    | Cluster 2                                                                                                                                                                                                                                                                                                                                                                                                                                                                                                                                                                                                                                                                                                                                                                                                                                                                                                                                                                                                                                                                                                                                                                                                                                                                                                                                                                                                                                                                                                                                                                                                                                                                                                               |
|-------------------------------------------------------------------------------------------------------------------------------------------------------------------------------------------------------------------------------------|----------------------------------------------------------------------------------------------|-------------------------------------------------------------------------------------------------------------------------------------------------------------------------------------------------------------------------------------------------------------------------------------------------------------------------------------------------------------------------------------------------------------------------------------------------------------------------------------------------------------------------------------------------------------------------------------------------------------------------------------------------------------------------------------------------------------------------------------------------------------------------------------------------------------------------------------------------------------------------------------------------------------------------------------------------------------------------------------------------------------------------------------------------------------------------------------------------------------------------------------------------------------------------------------------------------------------------------------------------------------------------------------------------------------------------------------------------------------------------------------------------------------------------------------------------------------------------------------------------------------------------------------------------------------------------------------------------------------------------------------------------------------------------------------------------------------------------|
| <p>AIM2, BLK, CCDC50, CD1C, COTL1, CTSH, HLA-DPB1, HLA-DQA1, KCNN4, MAP4K1, MARCKS, MS4A1, OAZ1, POU2AF1, POU2F2, PPP1R15A, PTPN1, RALGPS2, SCIMP, SCRN1, SPIB, SYK, SYNGR2, TBC1D9, TFEC, TLR10, TNFRSF13B, UBC, UBE2J1, WDFY4</p> | <p>BCL7A, BTG1, BTLA, DGKD, FAM129C, FOXP1, HLA-DMB, ICOSLG, PCDH9, TCL1A, TSPAN13, YBX3</p> | <p>ACTG1, ANXA1, AOA, APMAP, APOL3, APOL6, ARF1, ARHGEF1, ARL4C, ATP1A1, ATP2B4, ATP8B2, BCL11B, BIN2, BTN3A1, BTN3A2, BTN3A3, C11orf21, C1orf21, CAB39, CALM1, CALR, CAMK4, CANX, CBLB, CCDC88C, CCL5, CCND2, CCND3, CCSER2, CD2, CD247, CD300A, CD3D, CD3E, CD48, CD5, CD6, CD63, CD8A, CD96, CDC42SE2, CEP78, CFL1, CFLAR, CHD3, CST7, CTBP2, CTSW, CX3CR1, CYLD, CYTH1, CYTIP, DGKA, DGKZ, DIAPH1, DIP2A, DOK2, DYNC1H1, DYRK2, EFHD2, EIF3A, ESYT2, EVL, F2R, FBXW5, FCGR3A, FGD3, FGFBP2, FKBP5, FLNA, FOSL2, FYN, GBP5, GIMAP1, GIMAP4, GIMAP5, GIMAP7, GLG1, GNLY, GUK1, GZMA, GZMB, GZMH, HELZ, HERC1, HIPK1, HLA-A, HLA-B, HLA-C, HLA-E, HLA-F, HSPA5, HSPA8, ID2, IFITM1, IFITM2, IGF2R, IL10RA, IL2RB, IL32, IL6ST, IL7R, INPP4A, IQGAP2, ITGA6, ITGAL, ITGB1, ITGB2, ITK, ITM2B, JADE2, KCNAB2, KDM3A, KIAA1551, KLF13, KLRB1, KLRD1, KLRF1, KPNB1, LASP1, LCK, LCP1, LCP2, LDHB, LEF1, LINC00861, LITAF, LPIN2, MAN1A1, MATK, MBP, MCL1, MGAT4A, MLLT6, MSN, MYBL1, MYH9, MYL12A, MYL12B, MYL6, MYO1F, NCAM1, NDFIP1, NKG7, PAG1, PARP8, PBXIP1, PCED1B-AS1, PDE3B, PDZD4, PFN1, PIK3IP1, PIK3R1, PIM1, PIP4K2A, PPP2R5C, PREX1, PRF1, PRKCQ, PRMT2, PRPF38B, PRSS23, PTPN12, PTPRA, RAB27A, RAP1B, RARRES3, RASA3, RASAL3, RASGRP1, RASSF1, RASSF5, RBL2, RBMS1, REST, RICTOR, RNF125, RNF213, RPS6KA3, RUNX3, S100A4, S100A6, S1PR5, SAMD3, SAMD9, SELPLG, SEMA4D, SH2D1A, SIGIRR, SKP1, SLAMF7, SLC9A3R1, SLFN5, SMARCA2, SORL1, SPN, SPOCK2, SPTAN1, SRGN, SSBP3, ST3GAL1, STAT1, STK10, STK38, SYNE1, SYNE2, SYTL2, TAX1BP1, TBX21, TCF7, TES, TESPA1, TMC8, TNFAIP3, TNFRSF1B, TNK1, TPP2, TPST2, TRABD2A, TRAF3IP3, TRANK1, TSHZ1, TXK, UBE2G2, UTRN, VIM, WDR82, WIPF1, ZAP70, ZFP36L2, ZNF91</p> |

**Supplementary table 3.** List of genes identified as differentially expressed in both the scRNA and scATAC gene activities for each monocyte cluster.

| Cluster 4                                                                                                                                                                                                                                                                                                                                                                                                                                                                                                                                                                                                                                                                                                                                                                                                                                                                                                                                                                                                                                                                                                                                                                                                                                                                                                                                                                                                                                                                                                                                                                                                                                                                    | Cluster 5                                                                                                                                                                                                                                                                                                                                                                                                                                                                                                                                                                              |
|------------------------------------------------------------------------------------------------------------------------------------------------------------------------------------------------------------------------------------------------------------------------------------------------------------------------------------------------------------------------------------------------------------------------------------------------------------------------------------------------------------------------------------------------------------------------------------------------------------------------------------------------------------------------------------------------------------------------------------------------------------------------------------------------------------------------------------------------------------------------------------------------------------------------------------------------------------------------------------------------------------------------------------------------------------------------------------------------------------------------------------------------------------------------------------------------------------------------------------------------------------------------------------------------------------------------------------------------------------------------------------------------------------------------------------------------------------------------------------------------------------------------------------------------------------------------------------------------------------------------------------------------------------------------------|----------------------------------------------------------------------------------------------------------------------------------------------------------------------------------------------------------------------------------------------------------------------------------------------------------------------------------------------------------------------------------------------------------------------------------------------------------------------------------------------------------------------------------------------------------------------------------------|
| <p>ACTN1, ADAM15, ADAM8, AGTRAP, AHNAK, AHR, ALDH2, ANXA1, ANXA6, APLP2, APOL3, APP, ARHGAP26, ARHGEF40, ASGR2, ATP6V0B, ATP6V1A, ATP6V1F, BAZ2B, BHLHE40, BLVRB, BST1, CAPG, CASP4, CCDC149, CCDC88A, CCR1, CCR2, CD14, CD163, CD1D, CD63, CD84, CD93, CDA, CIITA, CKAP4, CLEC4A, CLEC4E, CLMN, CMIP, CMTM3, COMT, CPD, CPM, CREG1, CRISPLD2, CRTAP, CSF3R, CST3, CTSA, CTSH, CTSS, CXCR4, CXXC5, CYFIP1, CYP1B1, CYP27A1, DGKD, DHRS4, DYSF, EFHD2, EIF4G3, EMB, F13A1, F5, FAM129A, FAM198B, FCN1, FERMT3, FES, FKBP5, FLOT1, FNDC3B, FPR1, FRMD4B, G0S2, GAPDH, GLRX, GLT1D1, GM2A, GPX1, GRN, H2AFY, HEBP2, HEXB, HK2, HLA-A, HLA-DQB1, HLA-DRA, HLA-DRB5, HPSE, HSD17B4, IDH1, IGF2R, IGSF6, IL13RA1, IL4R, IL6R, IL6ST, IMPA2, IQGAP2, IRF2BP2, IRS2, ITGA5, ITGAM, ITGB2, IVNS1ABP, KCTD20, KDM4B, KDM7A, KIAA0040, KIF13A, KLF10, LAMP2, LAMTOR1, LAPTM5, LAT2, LBR, LGALS2, LGALS3, LINC00963, LITAF, LPGAT1, LRP1, LTB4R, LTB, LY86, LYZ, MAPK14, MARC1, MARCO, METTL9, MGST1, MID1IP1, MLKL, MLXIP, MND, MPEG1, MSRB1, MYCL, MYO1F, NCF4, NFE2, NFKBIA, NLRP12, NLRP3, NR4A2, NRG1, OSCAR, P4HB, PADI2, PADI4, PARP8, PEA15, PER1, PID1, PKM, PLA2G7, PLBD1, PLD3, PLEKHO1, PLXND1, PPIF, PRRC2B, PSTPIP1, PTPRE, PYGL, QPCT, QSOX1, RAB11FIP1, RAB27A, RAB3D, RBM47, RBP7, RIT1, RPS16, RPS8, S100A10, S100A12, S100A6, S100A8, S100A9, S1PR3, SCPEP1, SEMA4D, SEPT2, SGK1, SIRPA, SLC2A3, SLC40A1, SMARCD3, SOCS3, SORL1, STAB1, STX3, SULF2, SYK, TAGLN2, TALDO1, TAPBP, TBC1D9, TET3, THBS1, TLR4, TMEM173, TMEM205, TMEM71, TNFAIP2, TNFAIP3, TNFRSF1A, TPP1, TPT1, TREM1, TRIB1, TRPS1, TSPO, TXN, VEGFA, VIM, WLS, XRN2, YBX3, YWHAE, ZNF385A, ZNF467</p> | <p>ACOT9, ALDH3B1, ARRDC2, ASAH1, C15orf39, CDKN1B, CDKN1C, CKB, CRIP1, CSF1R, CSK, CYTH1, FAM110A, FAM49A, FCGR3A, FOXO1, FZD1, GNAI2, GPI, GPR137B, HES4, HLA-E, HSBP1, HSPA8, IFITM2, IQSEC1, KLF11, KLF12, KLF2, KLF7, KNDC1, LFNG, LRMP, LRRC25, LRRFIP1, LYL1, LYN, MAFB, MEG3, METRNL, MGLL, MRPS35, MS4A7, MTSS1, MYO1G, MYOF, NECAP2, PDPK1, PIK3CG, PILRA, PKN1, PPP1R17, PSAP, PTP4A2, PTPN1, PTPRC, RALB, RHOB, RIN3, RNH1, RRAS, SAT1, SFT2D2, SLC44A2, SMAD2, SNX5, SPG11, SPRED1, SSBP4, TPTPEP1, UNC119, VPS35, WARS, WAS, XIAP, YBX1, ZBTB7A, ZFAND5, ZFR, ZNF703</p> |

**Supplementary Table 4.** Results of the differential expression analysis for the cluster 6 of monocytes in the tri-omics experiment. The output of scanpy's rank\_gene\_groups method (which uses a one versus all two-sided t-test with benjamini-hochberg correction) is displayed for two known marker genes of monocyte-derived dendritic cells.

| names | scores   | logfoldchanges | pvals     | pvals_adj |
|-------|----------|----------------|-----------|-----------|
| CCR7  | 2.67e+01 | 5.40e+00       | 2.06e-157 | 9.74e-154 |
| CD2   | 2.15e+01 | 5.61e+00       | 2.75e-102 | 8.79e-100 |

**Supplementary Table 5.** List of the number of features measured in each modality of the datasets used and the number of neurons in hidden layers of the autoencoders .

| Dataset Name     | Number of features | Hidden size |
|------------------|--------------------|-------------|
| Cell lines/RNA   | >10000             | 64          |
| Cell lines/ATAC  | >10000             | 64          |
| PBMC 10X/RNA     | >10000             | 64          |
| PBMC 10X/ATAC    | >10000             | 64          |
| OP Multiome/RNA  | >10000             | 64          |
| OP Multiome/ATAC | >10000             | 64          |
| BMCITE/RNA       | >10000             | 64          |
| BMCITE/ADT       | 25                 | 20          |
| OP Cite/RNA      | >10000             | 64          |
| OP Cite/ADT      | 134                | 32          |
| Smartseq cortex  | >10000             | 64          |
| smFISH           | 33                 | 25          |
| Covid RNA        | >10000             | 64          |
| Hemato ATAC      | >10000             | 64          |
| Covid CyTOF      | 48                 | 32          |
| Neurons/RNA      | >10000             | 64          |
| Neurons/Images   | 2048               | 128         |

**Supplementary table 6.** Comparison of the running times of the benchmarked methods on the 10X PBMC dataset (9,378 cells per modality).

| Method       | Device | Runtime  |
|--------------|--------|----------|
| Seurat_v3    | CPU    | 12mn 18s |
| LIGER        | CPU    | 5mn 49s  |
| MultiMAP     | CPU    | 2mn 6s   |
| Uniport      | GPU    | 56mn 59s |
| scGLUE       | GPU    | 32mn 24s |
| scConfluence | GPU    | 23mn 38s |

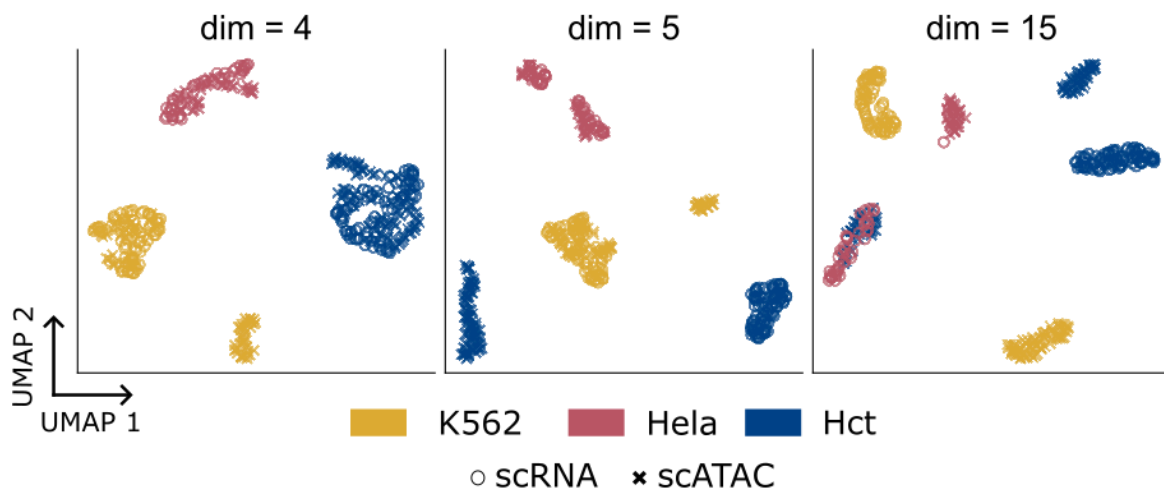

**Supplementary Figure 1.** 2D UMAP visualizations of the cell embeddings obtained by LIGER on the cell lines dataset for different values of the dimension of the latent space. Different colors in these UMAP plots correspond to the three different cell lines present in the data while the shape of the point markers correspond to the modality of origin of each cell (scRNA, scATAC).

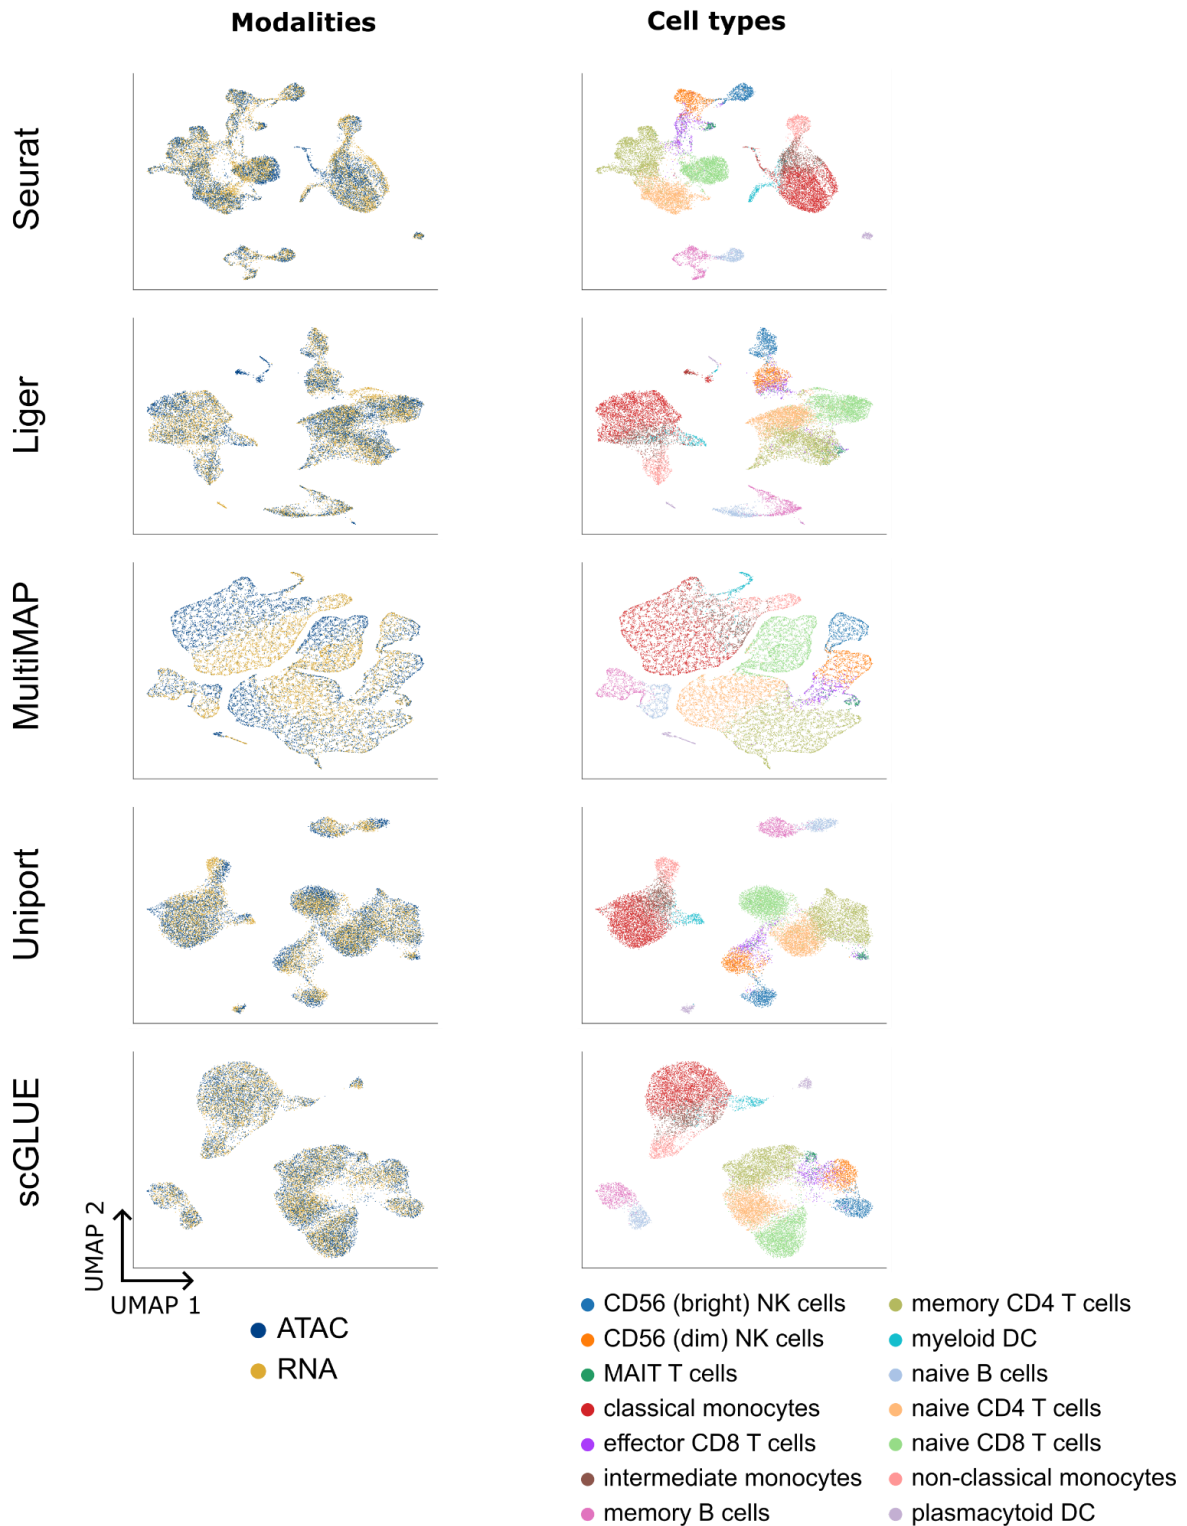

**Supplementary Figure 2.** 2D UMAP visualizations of the cell embeddings obtained by the five baselines (Seurat, Liger, MultiMAP, Uniport and scGLUE) on the *PBMC 10X* dataset. Cells are colored based on their modality of origin and their cell type annotation.

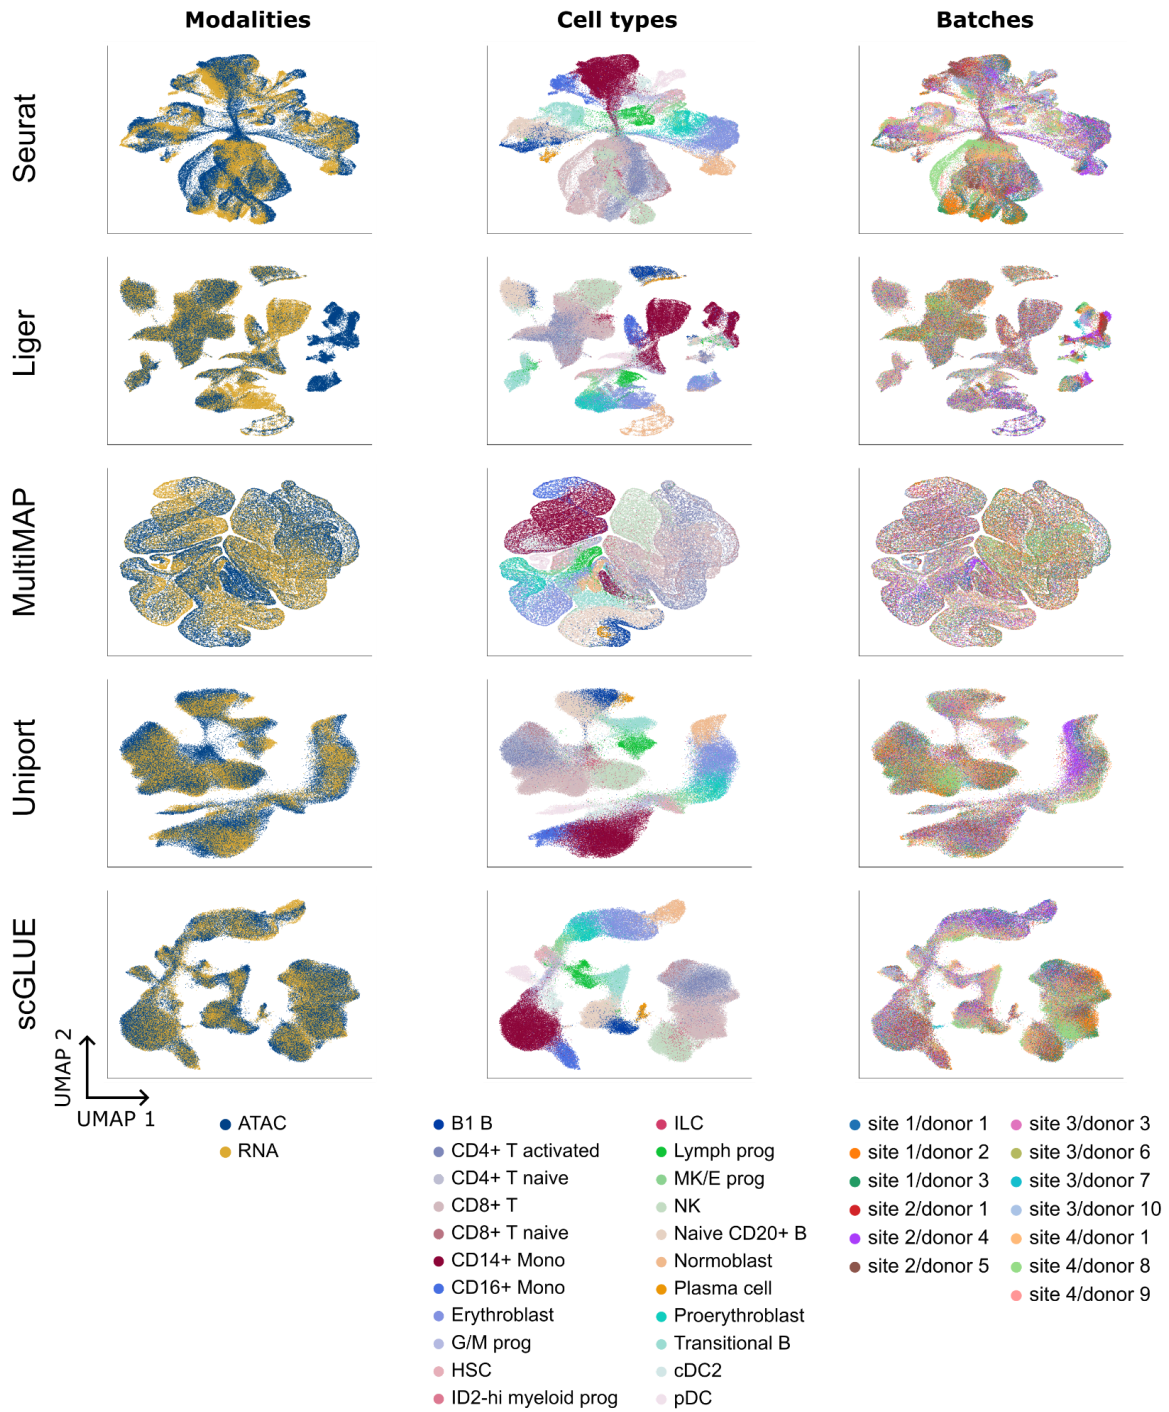

**Supplementary Figure 3.** 2D UMAP visualizations of the cell embeddings obtained by the five baselines (Seurat, Liger, MultiMAP, Uniport and scGLUE) on the *OP Multiome* dataset. Cells are colored based on their modality of origin, their cell type annotation or their batch of origin.



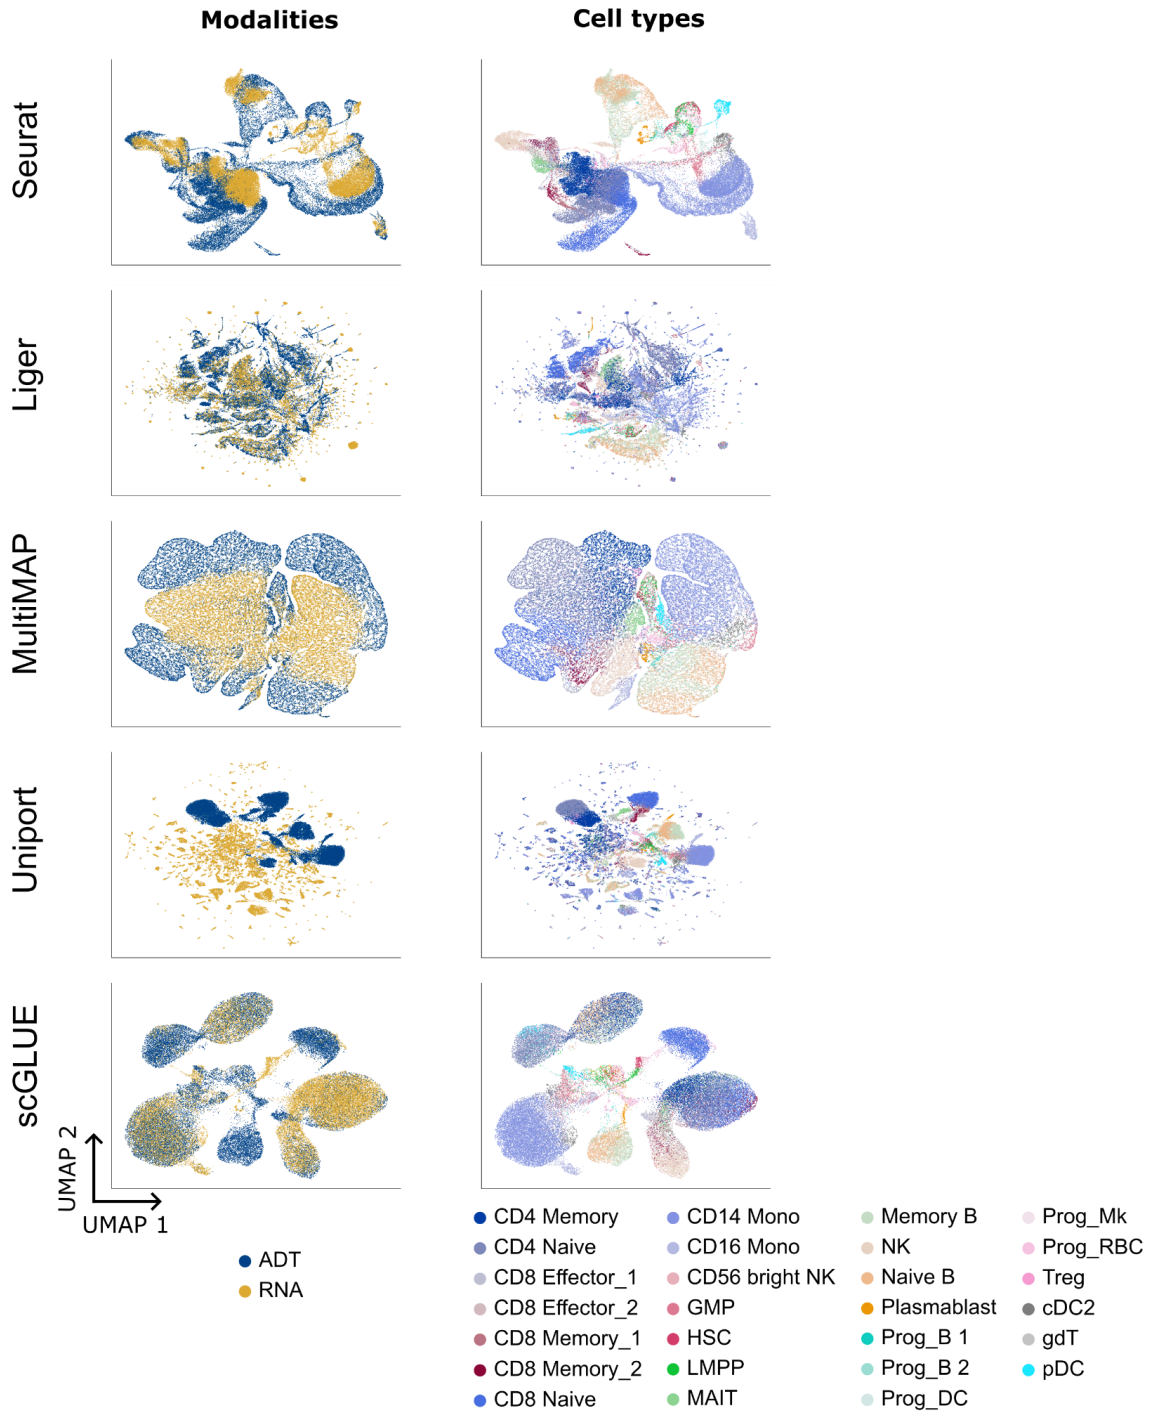

**Supplementary Figure 4.** 2D UMAP visualizations of the cell embeddings obtained by the five baselines (Seurat, Liger, MultiMAP, Uniport and scGLUE) on the *BMCITE* dataset. Cells are colored based on their modality of origin or their cell type annotation.

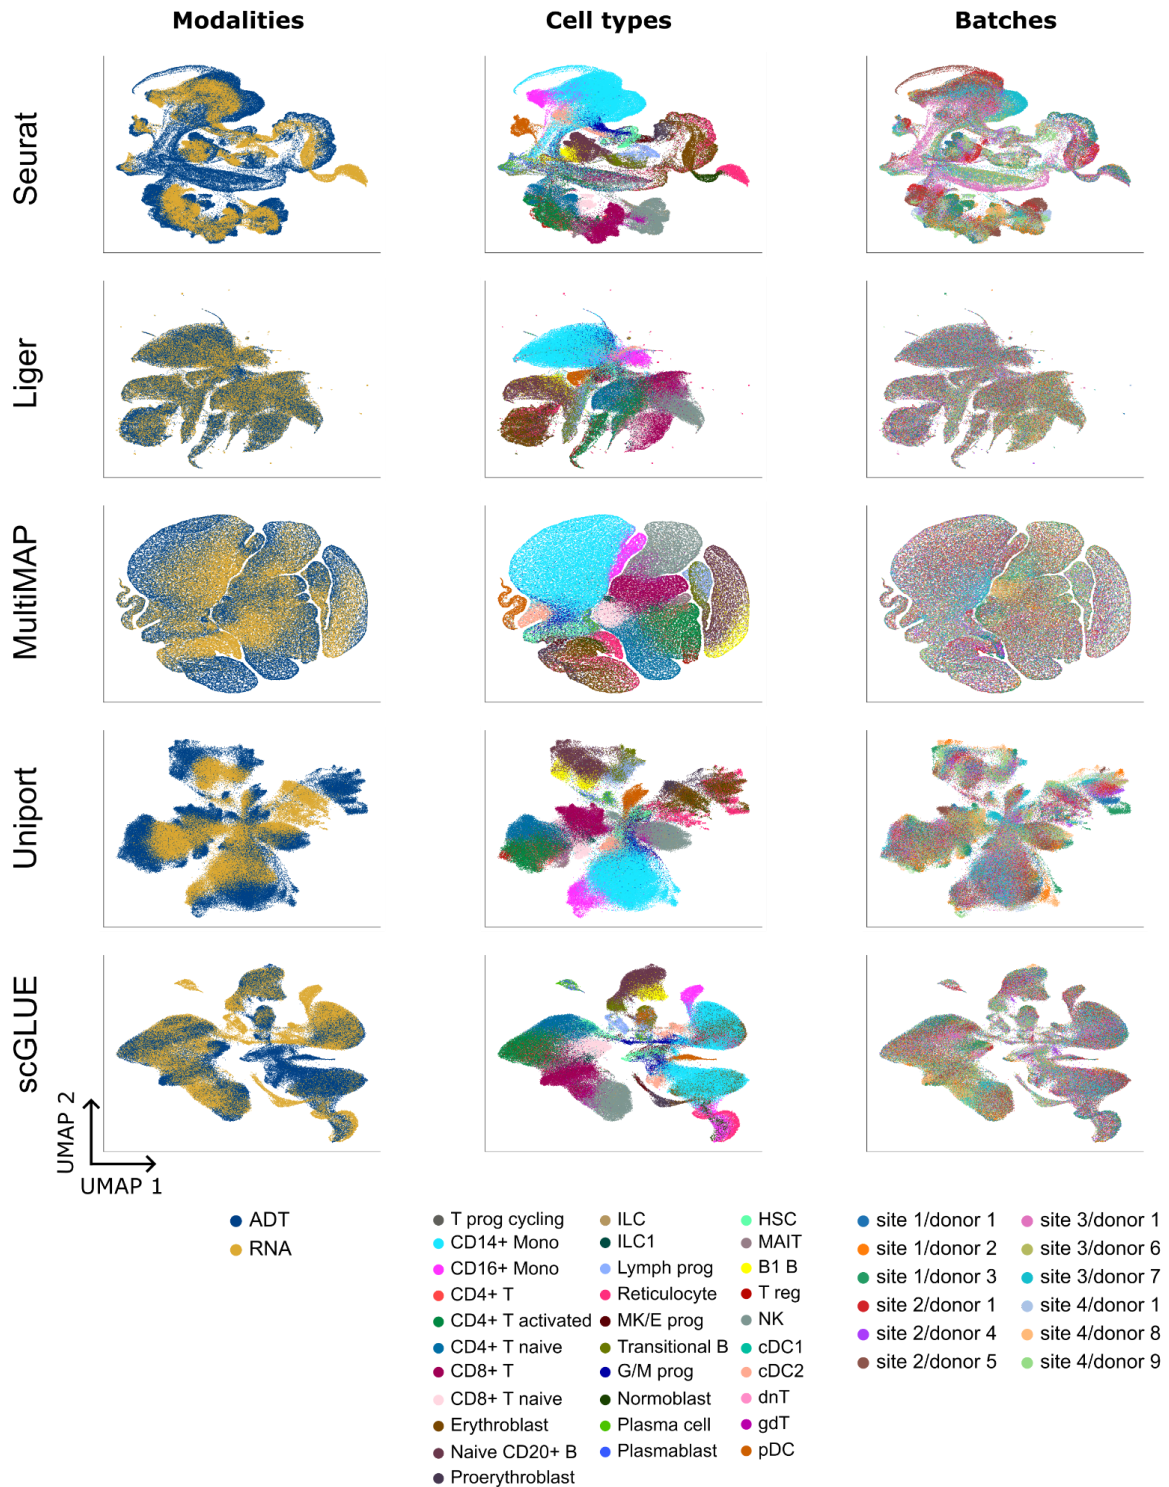

**Supplementary Figure 5.** 2D UMAP visualizations of the cell embeddings obtained by the five baselines (Seurat, Liger, MultiMAP, Uniport and scGLUE) on the *OP Cite* dataset. Cells are colored based on their modality of origin, their cell type annotation or their batch of origin.

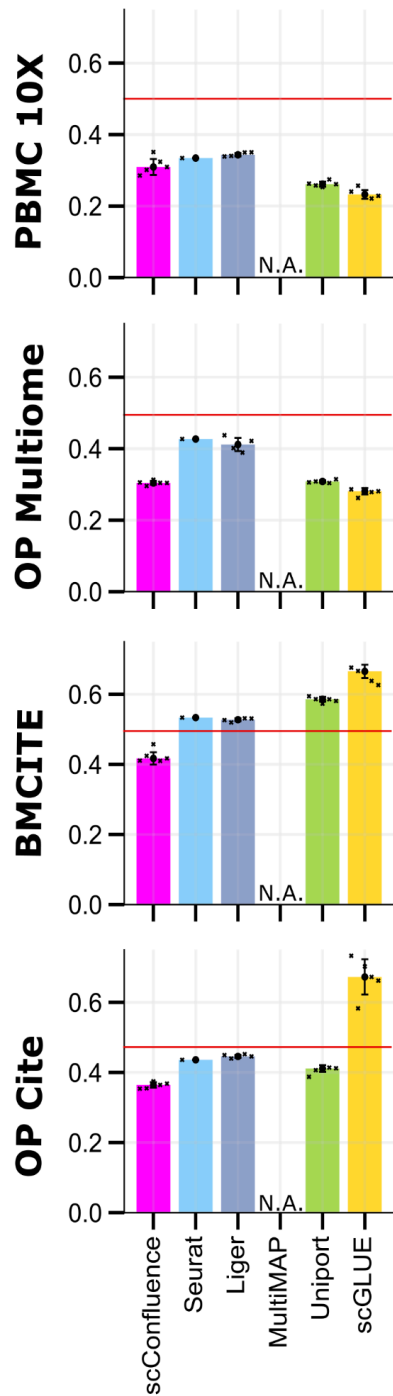

**Supplementary Figure 6.** Evaluation of the cell type FOSCTTM for all methods on the four benchmark datasets as well as the cell lines dataset. The horizontal line  $y=0.5$  is the theoretical result of the trivial approach which consists in the random alignment of cells from the same cell type across modalities. Error bars in the plots specify the standard deviation across  $n=5$  random initialization seeds for each method and they are centered on the median result. Inside bar plots, small dark stars represent individual seed results. Source data are provided as a Source Data file.

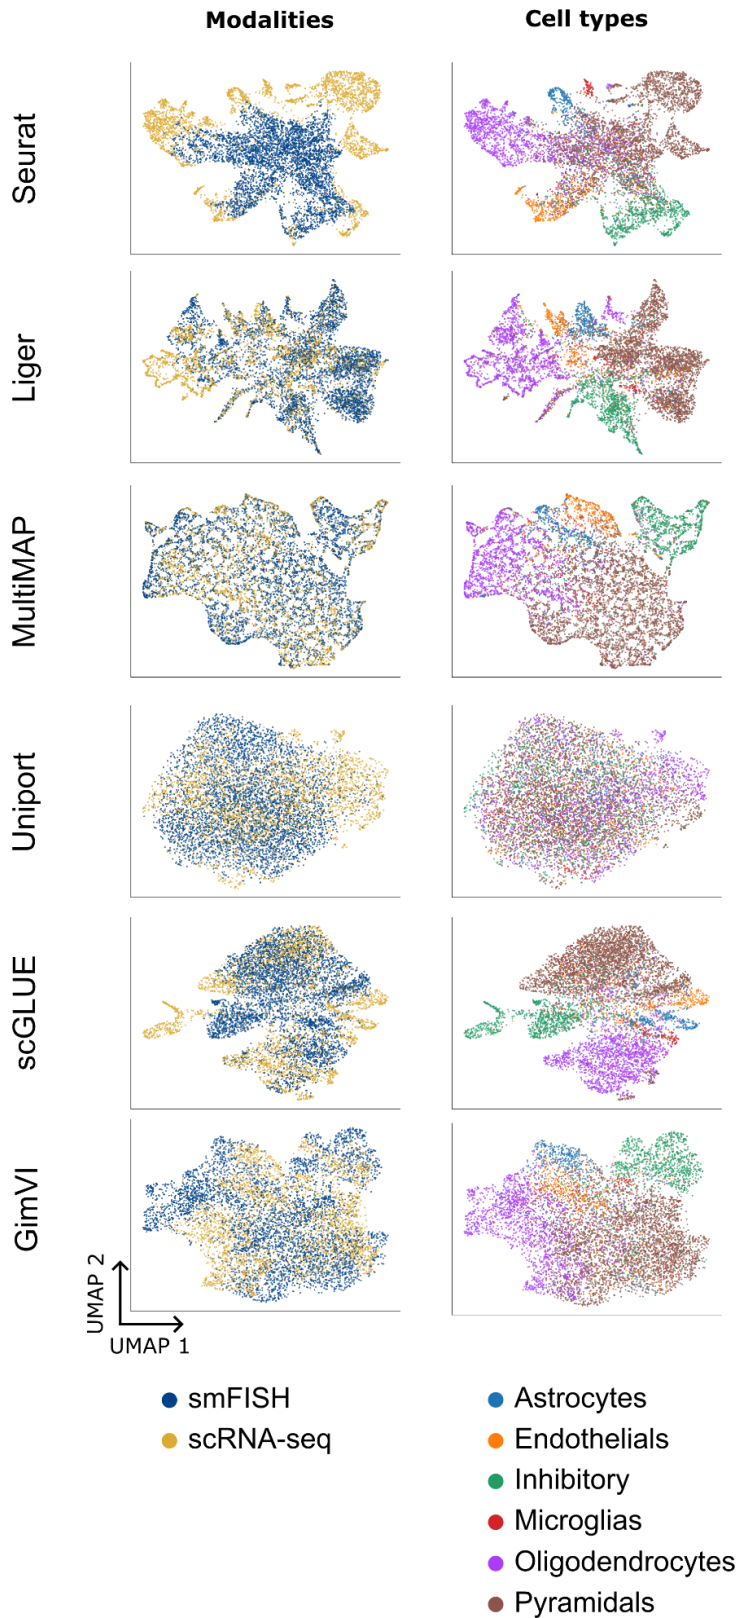

**Supplementary Figure 7.** 2D UMAP visualizations of the cell embeddings obtained by the six baselines (Seurat, Liger, MultiMAP, Uniport, scGLUE and GimVI) on the *scRNA/smFISH* dataset. Cells are colored based on their modality of origin and their cell type annotation.

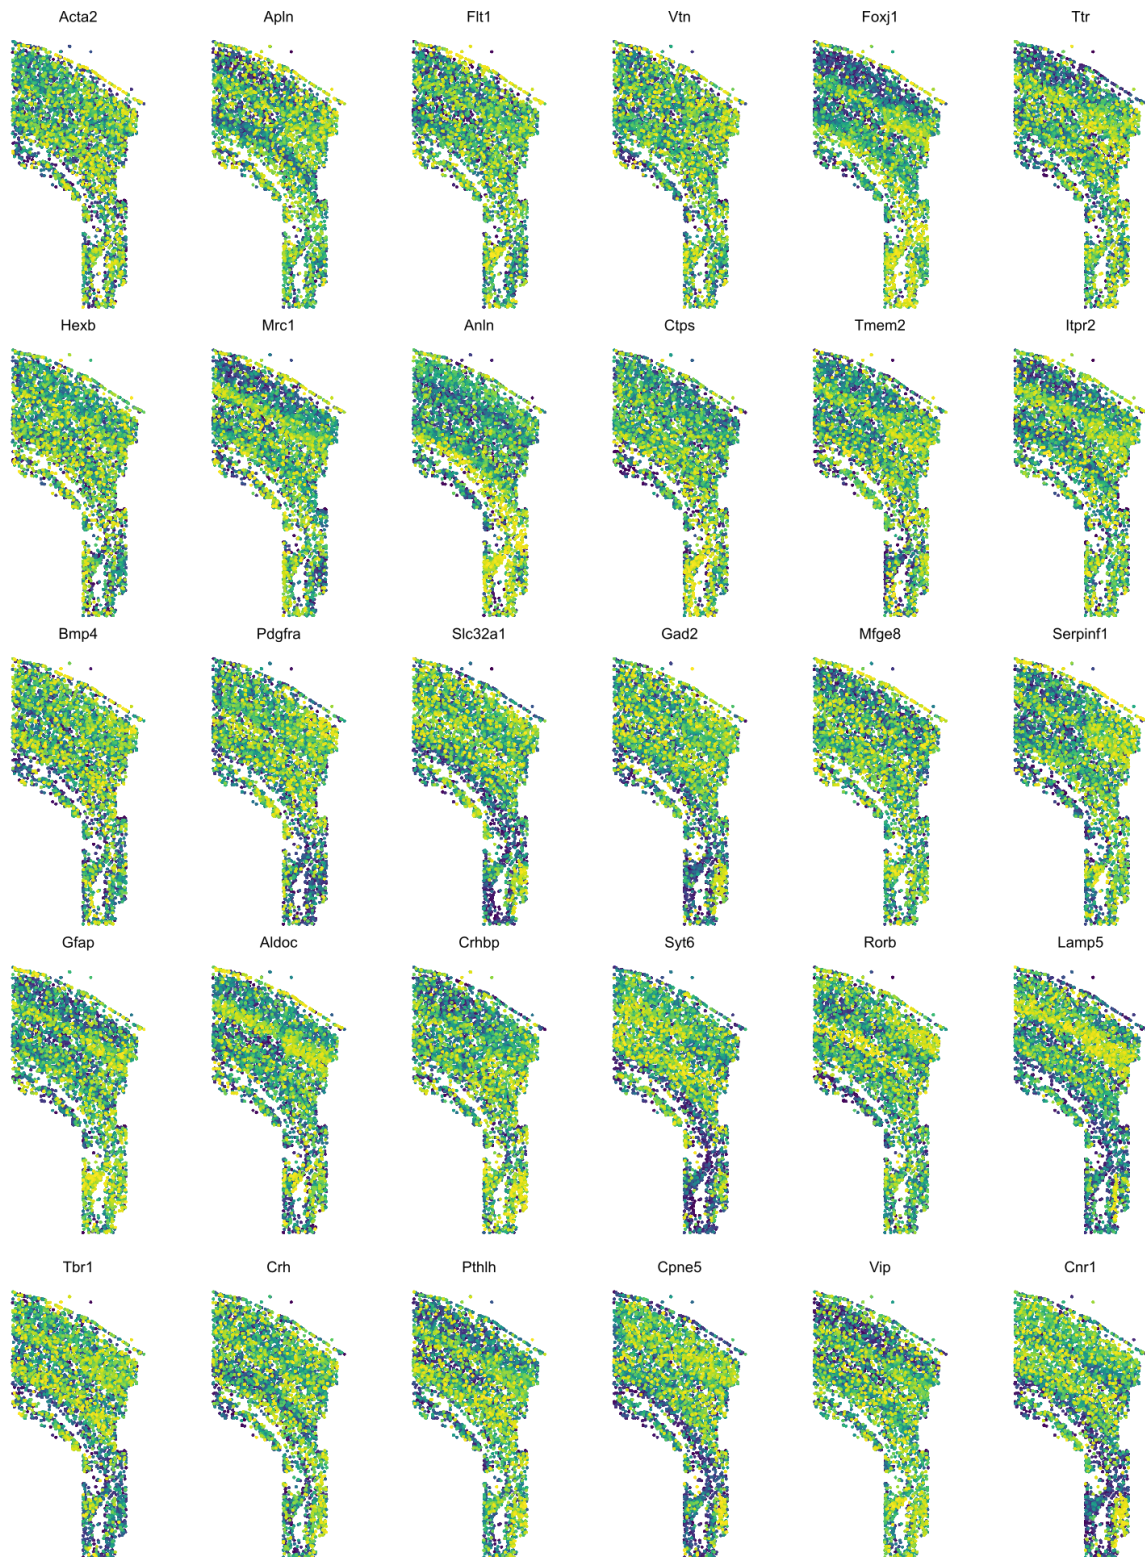

**Supplementary Figure 8.** Spatial pattern of expression of scConfluence's imputations on the thirty held-out smFISH genes which were not displayed in Figure 6.

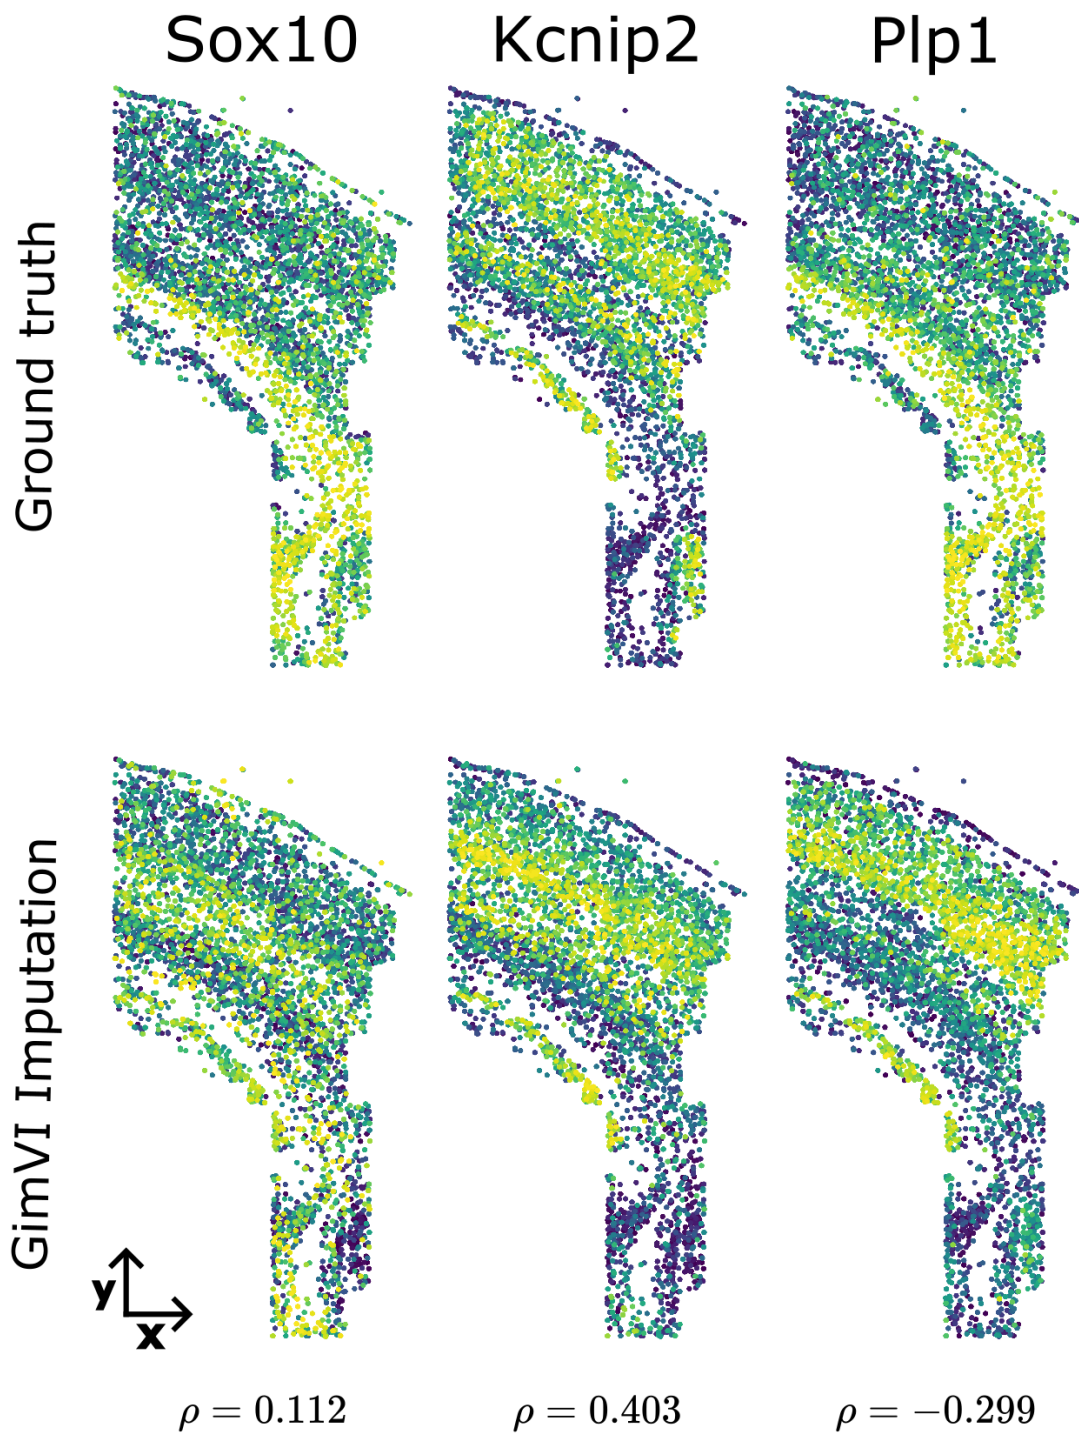

**Supplementary Figure 9.** Spatial pattern of expression of GimVI's imputations (bottom) on three held-out smFISH genes and their ground-truth pattern of expression (top). Spearman correlations between the ground-truth and imputed counts are written at the bottom.

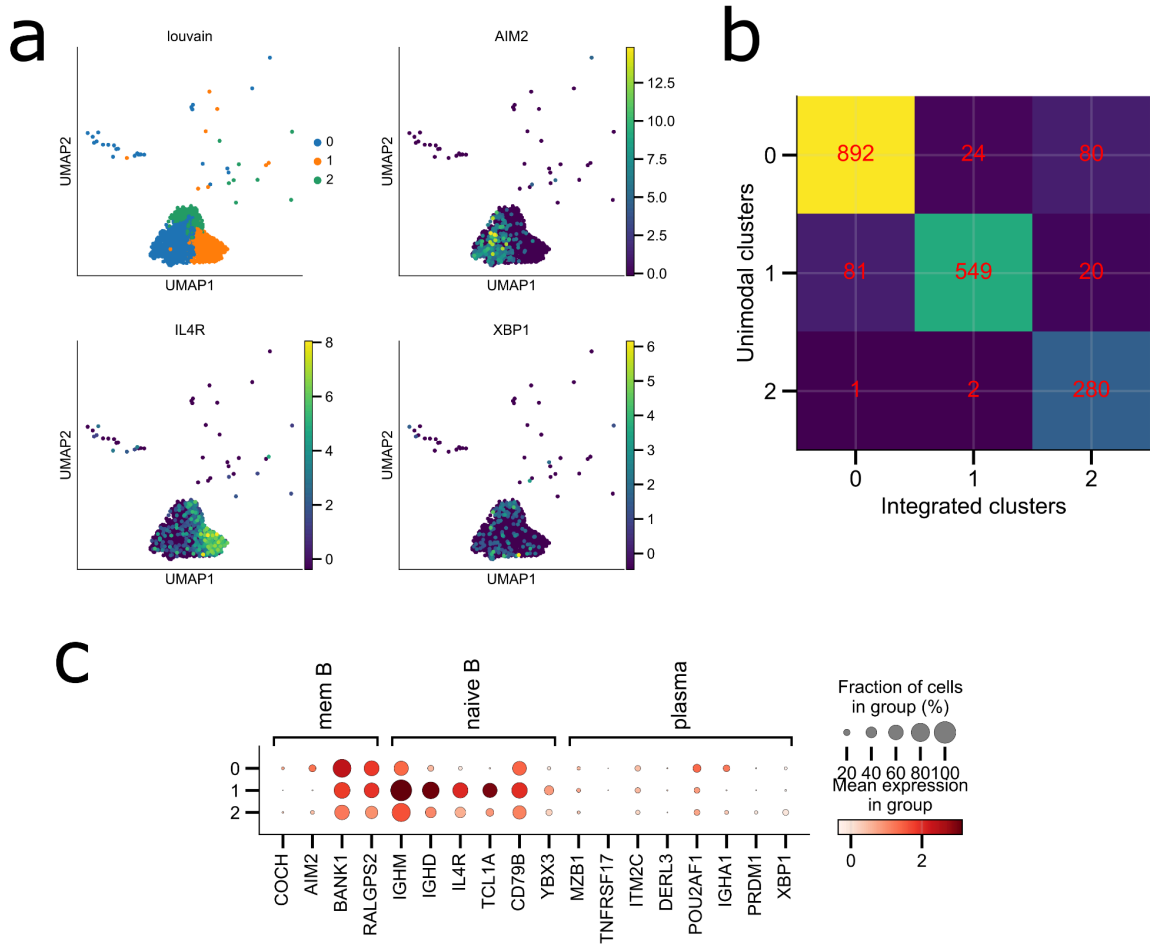

**Supplementary Figure 10. Heterogeneity inside the scRNA B cells.** (a) scRNA B cell clusters derived from a unimodal analysis and marker expressions. (b) Comparison of the cluster obtained in the tri-omics integration analysis and clusters obtained by analyzing the scRNA B cells on their own. (c) Dotplot of known marker genes of memory, naive and plasma B cells.

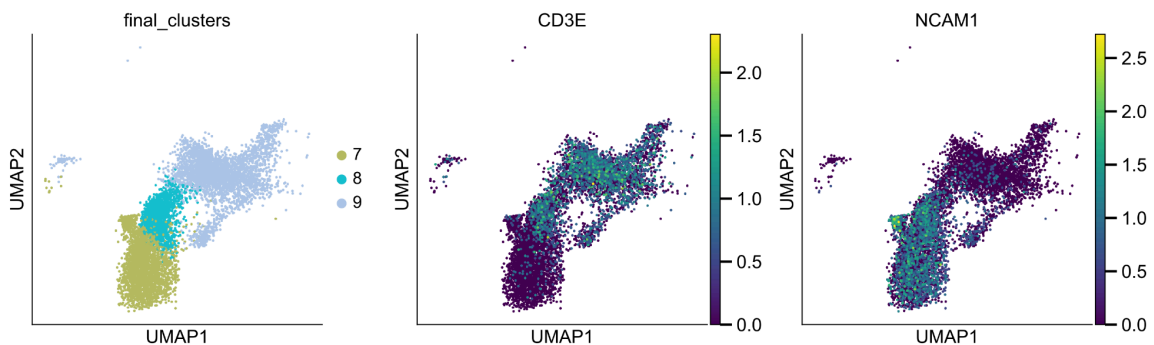

**Supplementary Figure 11. scRNA NKT cells.** UMAP 2D projections of scConfluence's cell embeddings of scRNA cells in cluster 7, 8 and 9. Cells are colored based by their cluster annotation and their level of expression of CD3E and NCAM1 which are markers of CD8 T cells and NK cells respectively.

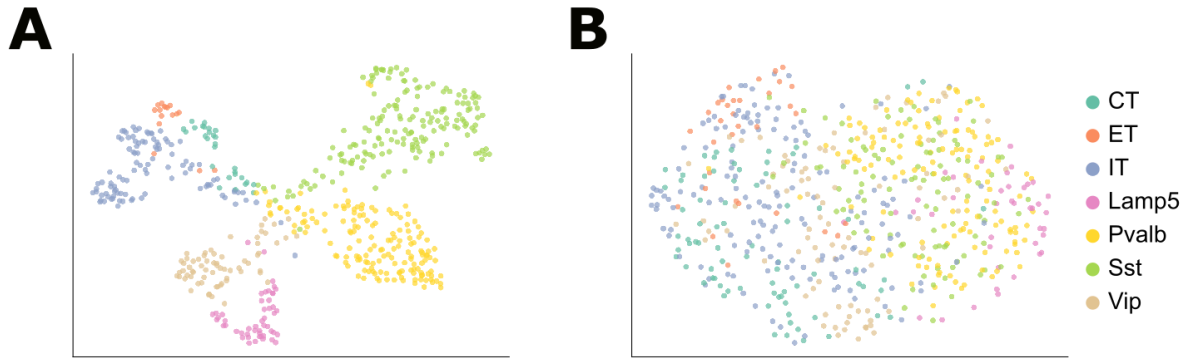

**Supplementary Figure 12. Unimodal embeddings of scRNA-seq and morphologies before integration.** UMAP visualizations of cell embeddings obtained by training independent autoencoders on the two modalities, (a) scRNA counts and (b) neuronal morphologies, without integrating them together. Cell embeddings are colored by their transcriptomic cell type annotations.



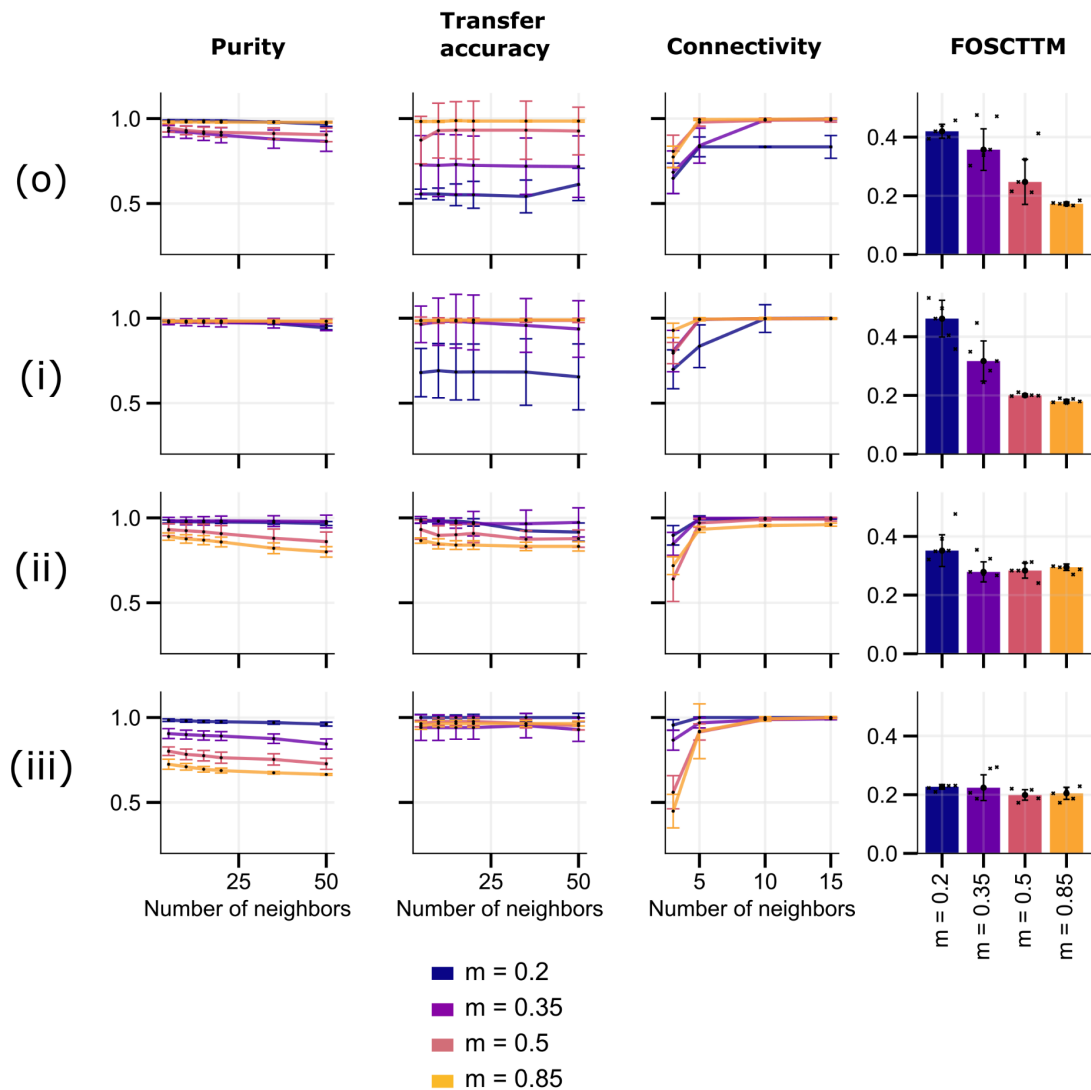

**Supplementary Figure 13. The impact of the mass parameter for different degrees of unbalancedness.** Using the same evaluation metrics and datasets as in Figure 2, we compare the results of training of the scConfluence model with different values of the mass parameter  $m$ . Error bars in the plots specify the standard deviation across  $n=5$  random initialization seeds for each method and they are centered on the median result. Inside bar plots, small dark stars represent individual seed results. Source data are provided as a Source Data file.

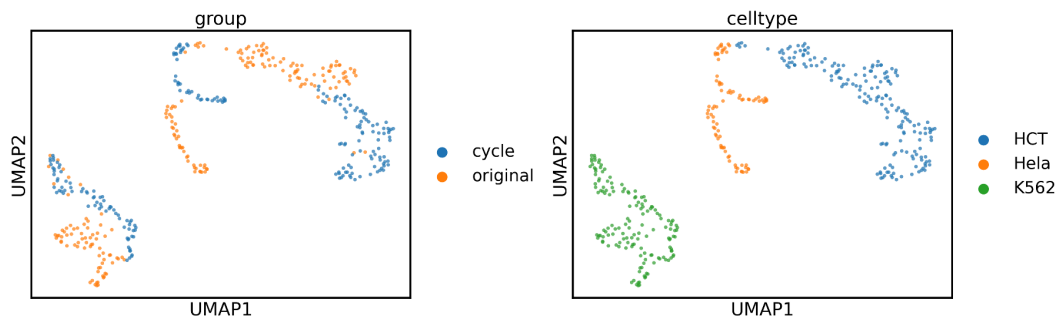

**Supplementary Figure 14. 2D UMAP visualizations of the scRNA cell embeddings obtained by scConfluence.** The “original” embeddings correspond to scRNA cells directly encoded to the latent space while the “cycle” embeddings are results of applying first the ATAC modality’s decoder then the ATAC modality’s encoder to the “original” embeddings.

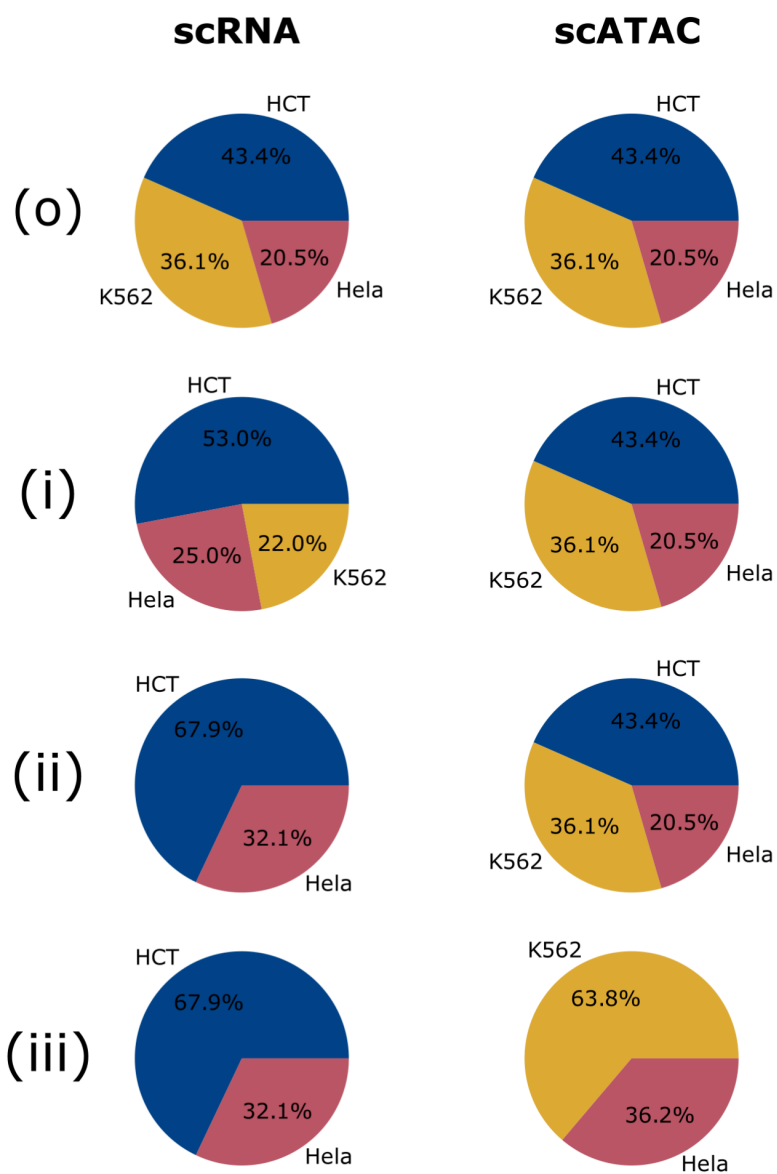

**Supplementary Figure 15.** Proportions of cell types present in each modality across the four cell lines scenarios in the first experiment. Source data are provided as a Source Data file.

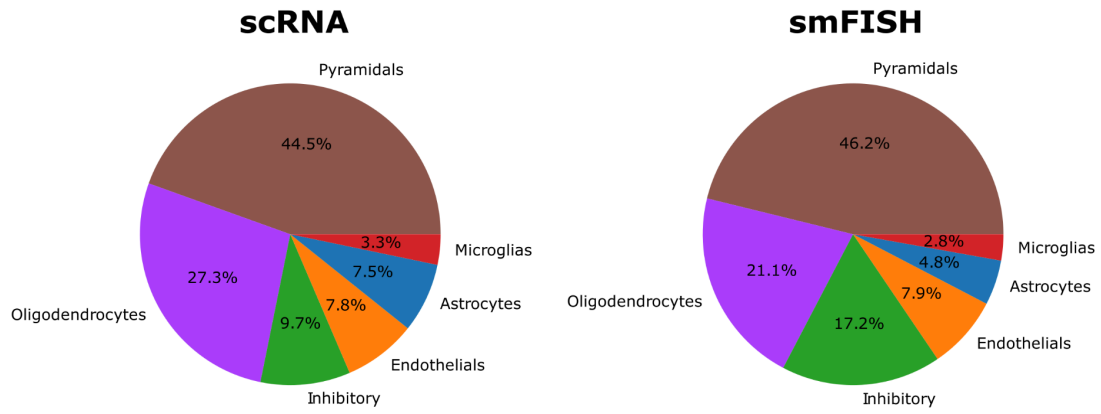

**Supplementary Figure 16.** Proportions of cell types present in each modality of the mouse somatosensory cortex experiment. Source data are provided as a Source Data file.

## scRNA

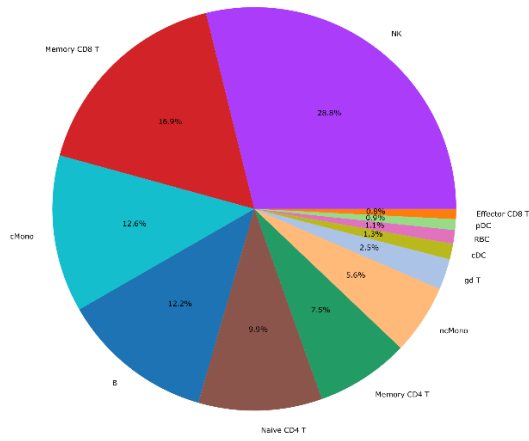

## scATAC

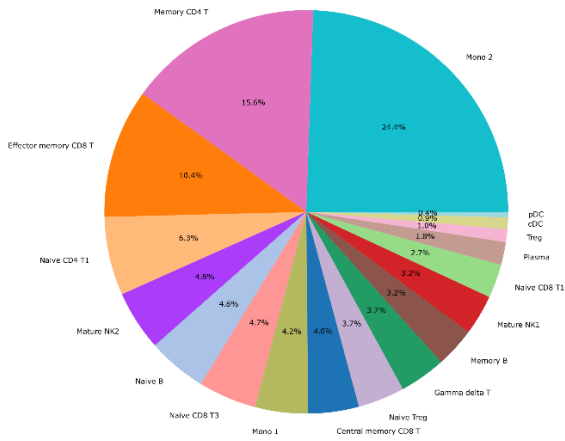

## CytoF

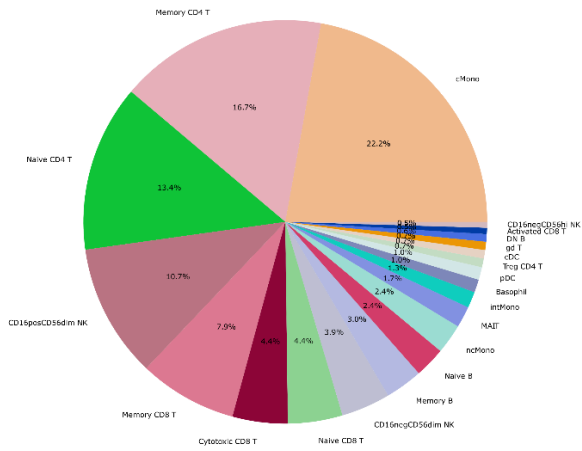

**Supplementary Figure 17.** Proportions of cell types present in each modality of the tri-omics PBMC experiment. Source data are provided as a Source Data file.

## scRNA

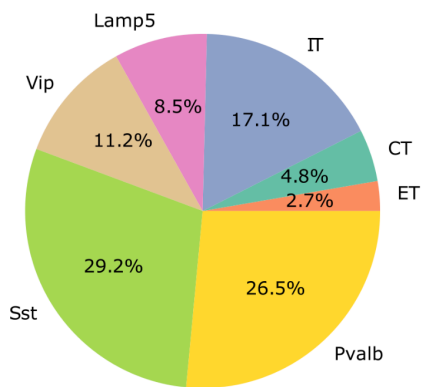

## Images

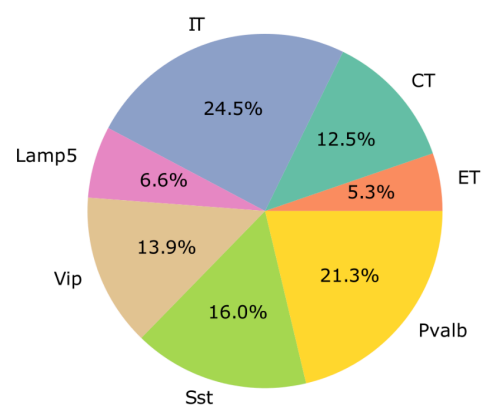

**Supplementary Figure 18.** Proportions of cell types present in each modality of the Patch-seq experiment. Source data are provided as a Source Data file.
